# Supplementary material for: ECPAS/Ecm29-Mediated 26S Proteasome Disassembly is an Adaptive Response to Glucose Starvation
Source: bioRxiv preprint, doi:10.1101/2022.06.06.495046, version 2 (2022-06-15)
Supplement: Supplementary Information [file 495046_file04.pdf]

**ECPAS/Ecm29-Mediated 26S Proteasome Disassembly Is an Adaptive Response  
to Glucose Starvation**

Won Hoon Choi, Yejin Yun, Insuk Byun, Seho Lee, Jiho Sim, Shahar Levi, Sumin Kim, Seo Hyeong Park, Jeongmoo Jun, Kwang Pyo Kim, Yong Tae Kwon, Dohyun Han, Tomoki Chiba, Chaok Seok, Michael H. Glickman\*, and Min Jae Lee\*

\*Correspondence should be addressed to M.J.L. ([minjlee@snu.ac.kr](mailto:minjlee@snu.ac.kr)) and M.H.G. ([glickman@technion.ac.il](mailto:glickman@technion.ac.il))

This PDF file includes:

Supplementary Figures 1 to 4

Supplementary Table 1

## SUPPLEMENTARY FIGURES

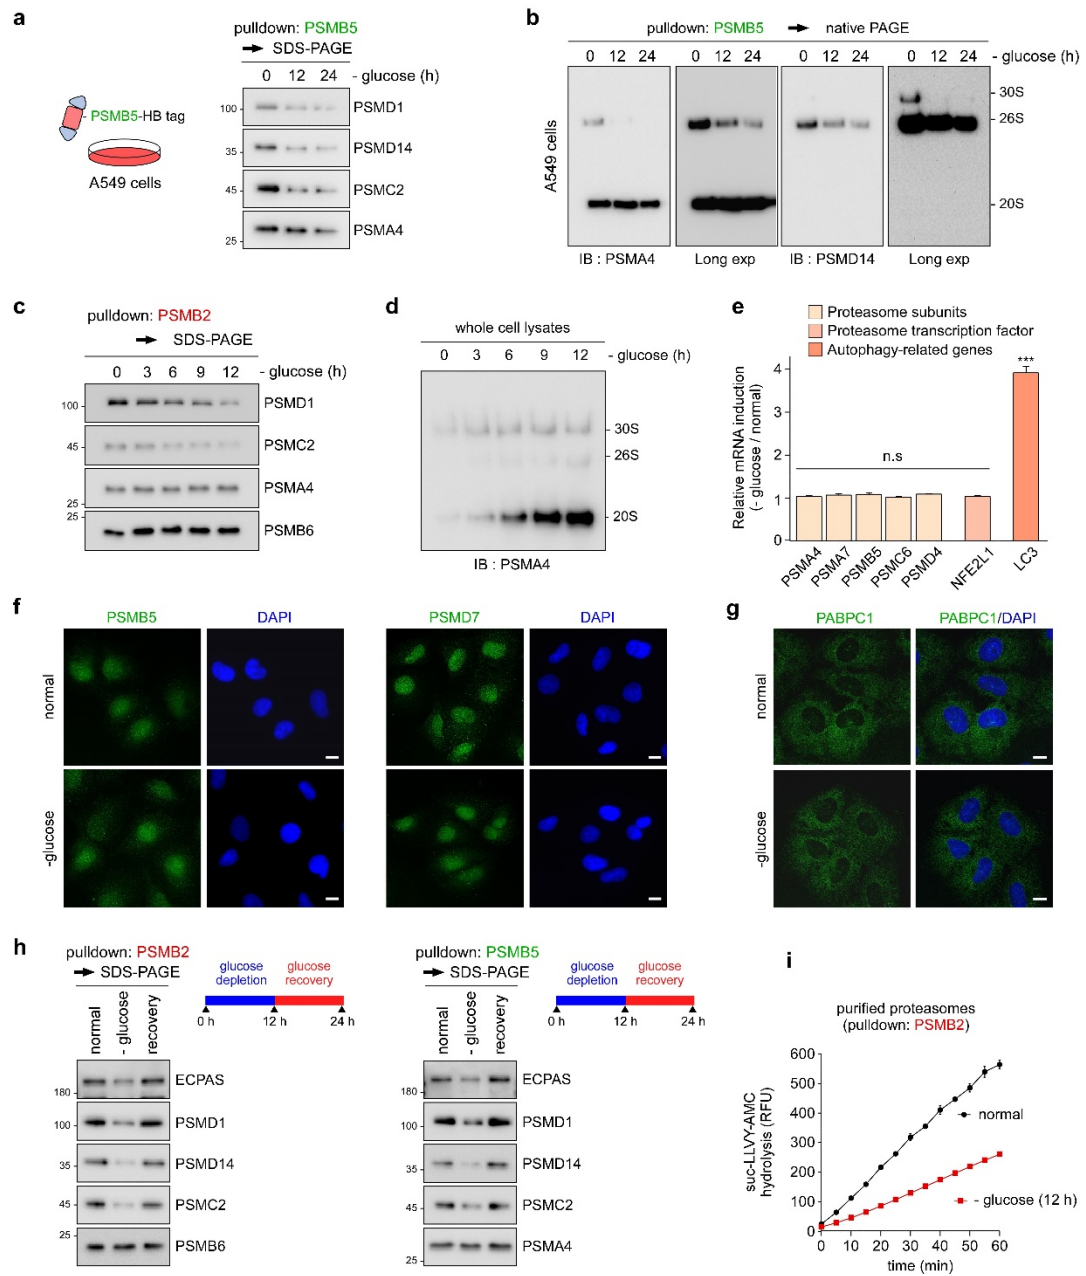

**Supplementary figure 1. Glucose depletion leads to the dissociation of intracellular 26S/30S proteasomes into 20S and 19S subcomplexes**

(a) PSMB5-HB proteasomes were affinity-purified from A549-PSMB5-HB stable cells, which were glucose-deprived for the indicated periods (0, 12, and 24 h), and were subjected to SDS-PAGE and immunoblotting (IB) using antibodies against 20S and 19S subunits. (b) As in (a),

except that the purified proteasomes were resolved using non-denaturing (native) PAGE with subsequent IB; blots were probed for PSMA4 or PSMD14. (c) HEK293-PSMB2-HB cells were cultured in glucose-depleted media for indicated time periods (0 to 12 h), and the proteasome subunit levels in purified proteasomes were analyzed by SDS-PAGE/IB. (d) As in (c), except that the whole-cell lysates (WCLs) were analyzed using native PAGE/IB. (e) A549 cells were cultured in glucose-depleted media for 12 h, total RNA was isolated, and proteasome subunit genes (*PSMA4*, *PSMA7*, *PSMB5*, *PSMC6*, and *PSMD4*), a transcription factor of proteasome biogenesis (*NFE2L1*), and an autophagy-related gene (*LC3*) were analyzed by quantitative reverse transcription-polymerase chain reaction (qRT-PCR). *GAPDH* mRNA levels were used to normalize the results. Values are represented as the mean  $\pm$  s.d. of three independent experiments (N = 3); \*\*\* $p < 0.001$  (one-way analysis of variance (ANOVA) with Bonferroni's multiple comparison test). n.s., not significant. (f) Representative images of A549 cells treated with glucose-depleted media for 12 h. Immunofluorescence staining with anti-PSMB5 (*left*) or anti-PSMD7 (*right*) antibodies (green). Nuclei were counter-stained with DAPI (blue). (g) As in (f), except that poly(A) binding protein cytoplasmic 1 (PABPC1/PABP1) was immunostained as a marker of stress granules (h) (*left*) HEK293-PSMB2-HB cells were cultured in glucose-depleted media for 12 h and re-incubated with normal (glucose-containing) media for an additional 12 h. Purified PSMB2-HB proteasomes were subjected to native PAGE/IB. (*right*) The same experiments were performed with A549-PSMB5-HB stable cells. Considering that there was no induction of proteasome subunits and *NFE2L1*/*Nrf1* genes during glucose starvation, as shown in panel (e), these results strongly suggest that the reconstitution of 26S proteasomes might be the reassembly of pre-existing 20S and 19S subcomplexes, instead of *de novo* synthesized 26S proteasomes. (i) Proteasome activity was measured using suc-LLVY-AMC and purified PSMB2-HB proteasomes under normal and glucose-depleted (for 12 h) conditions. These data supplement Figure 1.

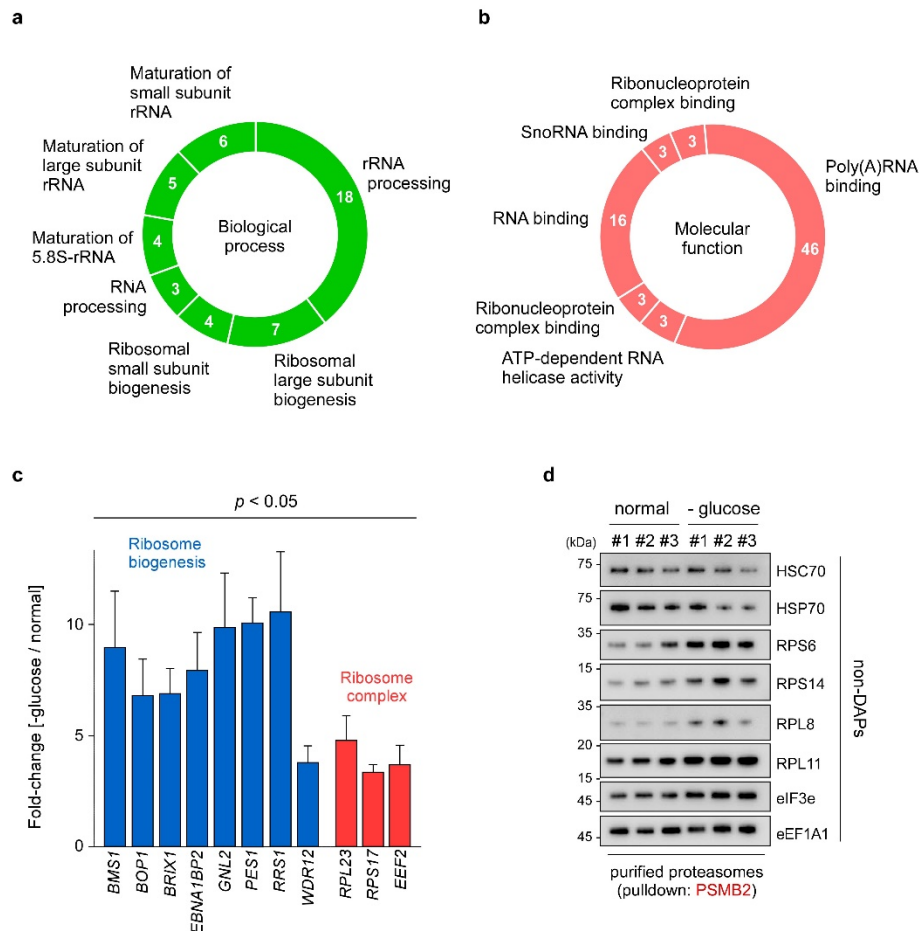

**Supplementary figure 2. Gene ontology (GO) enrichment of the differentially associated proteins (DAPs), which were more strongly bound to the purified proteasome during glucose starvation**

(a and b) Classification of increased DAPs by GO analysis by DAVID functional annotation tool. The important biological processes (a) and molecular functions (b) were enriched, and the count numbers are displayed. Note that the majority of increased DAPs are involved in ribosome biogenesis and rRNA processing. (c) Quantification of fold-changes in the increased DAPs, which are ribosome subunits or involved in ribosome biogenesis. Data represent mean  $\pm$  s.d (N = 3).  $p < 0.05$  (one-way ANOVA with Bonferroni's multiple comparison test). (d) Examination of non-DAPs, whose levels were changed less than 2-fold from the iBAQ-MS analysis using IB analysis. These data supplement Figure 2.

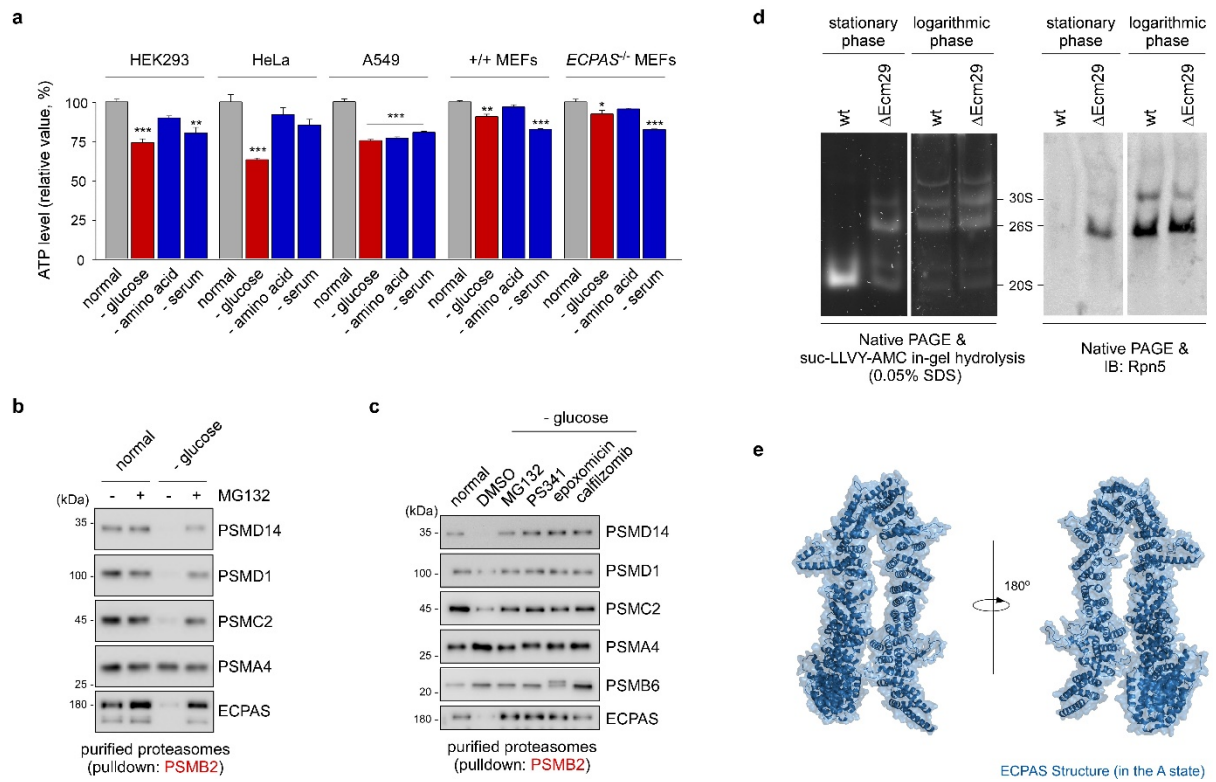

### Supplementary figure 3. Changes in cellular ATP levels and yeast 26S proteasomes during nutrient deprivation

(a) Nutrient deprivation had modest effects on intracellular ATP levels. HEK293, HeLa, A549, wild-type (+/+), and *ECPAS*<sup>-/-</sup> mouse embryonic fibroblasts (MEFs) were cultured in nutrient-restricted (glucose-free, amino acid-free, and serum-free) media for 12 h, and cellular ATP concentrations were measured using the bioluminescent assay (based on ATP-dependent luciferin-luciferase reactions). Data are presented as the mean  $\pm$  s.d. (N = 3); \* $p$  < 0.05, \*\* $p$  < 0.01, \*\*\* $p$  < 0.001 (one-way ANOVA with Bonferroni's multiple comparison test). (b) Inhibition of 20S-19S disassembly by MG132 (5  $\mu$ M) in HEK293-PSMB2-HB stable cells. Affinity purified PSMB2-HB proteasomes were analyzed by SDS-PAGE/IB. (c) Cells treated with both reversible (MG132 and PS-341) and irreversible (epoxomicin and carfilzomib) proteasome inhibitors were analyzed as described in (b). (d) Yeast proteasomes were purified in stationary or logarithmic phase cultures, separated by native PAGE, and visualized by suc-

LLVY-AMC in-gel hydrolysis in the presence of 0.05% SDS (*left*). After the in-gel activity assay, the gel was transferred to a PVDF membrane and subjected to IB against yeast Rpn5 (*right*). (e) A predicted structure (ribbon diagram) of ECPAS by AlphaFold (UniProt ID: Q5VYK3). These data supplement Figure 3.

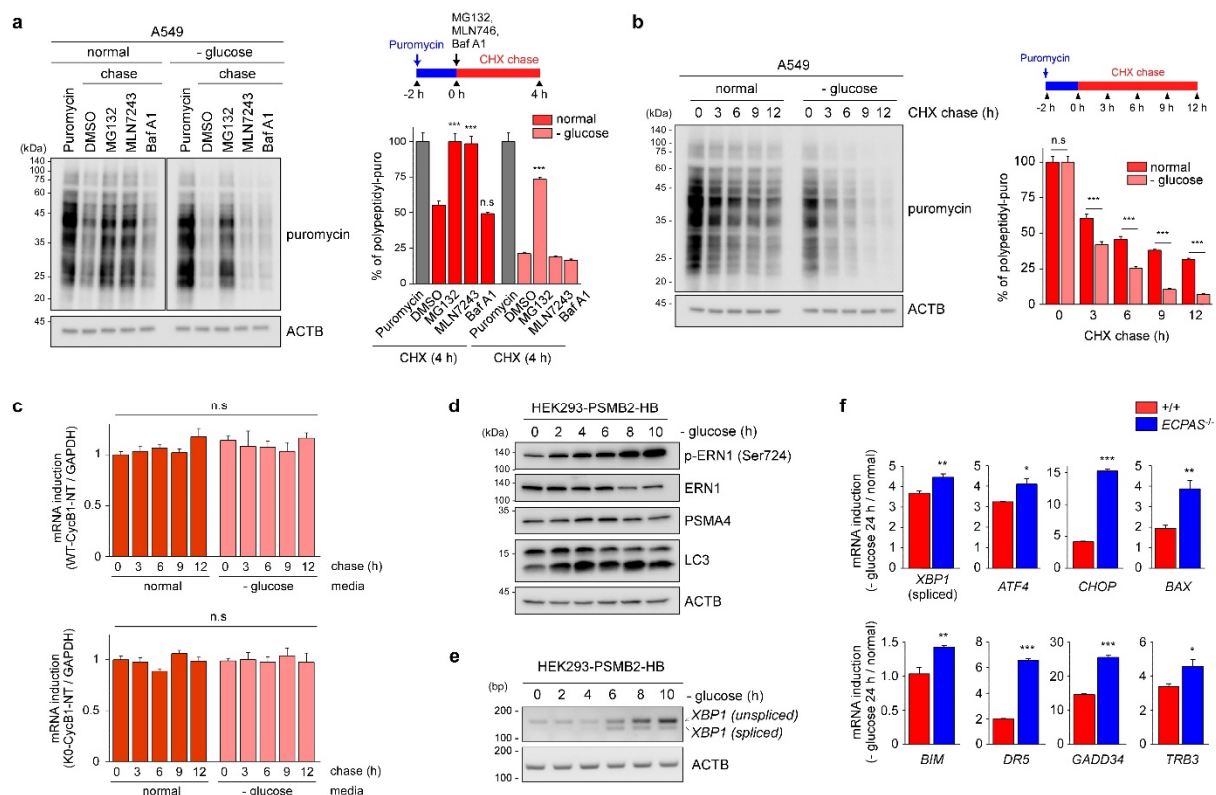

## Supplementary figure 4. Misfolded protein degradation and ER stress in glucose-depleted cells

(a and b) As in Figures 4a and 4b, except that the puromycin-labeling and monitoring of polypeptidyl-puro species under various conditions were conducted with A549 cells. (*right panels*) Quantification of polypeptidyl-puro levels, which were normalized to endogenous ACTB/ $\beta$ -actin levels. Data represent the average percentage of remaining polypeptidyl-puro (mean  $\pm$  s.d.) of three independent experiments (N = 3), \*\*\*  $p < 0.001$  (one-way ANOVA followed by the Bonferroni *post hoc* test). (c) Total RNA was isolated from the WT- and K0-CycB1-NT-transfected HEK293 cells after glucose starvation for 12 h. Quantitative RT-PCR was conducted using primers specific for either WT or K0-CycB-NT. mRNA levels were normalized to levels of the *GAPDH* gene. The plotted values are means  $\pm$  s.d. of three independent experiments. n.s., not significant. (d) HEK293-PSMB2-HB cells were cultured in glucose-depleted media for indicated time periods (0 to 10 h). WCLs were separated using

SDS-PAGE with subsequent IB; blots were probed for ERN1/IRE1, p-ERN1/p-IRE1 (Ser 724),  $\alpha 3$ , LC3, and ACTB/ $\beta$ -actin. (e) As in (a), except that mRNA levels of endogenous unspliced *XBPI*, spliced *XBPI*, and *ACTB* from HEK-2930PSMB-HB cells were measured by RT-PCR analysis. (f) Total RNA was isolated from +/+ and *ECPAS*<sup>-/-</sup> MEFs after 24 h of glucose starvation and subjected to quantitative RT-PCR for various unfolded protein response (UPR)-target genes. Data are presented as the means  $\pm$  s.d. of three independent experiments (N = 3). \*,  $p < 0.01$  (one-way ANOVA with Bonferroni's multiple comparison test). These data supplement Figure 4.

**Supplementary Table S1.** (a) All the proteins identified by iBAQ-MS. (b) Normalized quantities of the identified proteins based on the levels of the PSMB2 subunit. (c) Decreased DAPs after glucose depletion. (d) Increased DAPs after glucose depletion.



[illegible]



[illegible]



|                                                                                                                                                                                                                                                                                                                                                                                                                                                                                                                                                                                                                                                                                                                                                                                                                                                                                                                                                                                                                                                                                                                                                                                                                                                                                                                                                                                                                                                                                                                                                                                                                                                                                                                                                                                                                                                                                                                                                                                                                                                                                                                                                                                                                                                                                                                                                                                                                                                                                                                                                                                                                                                                                                                                                                                                                                                                                                                                                                                                                                                                                                                                                                                                                                                     | Nucleoside diphosphate kinase | Nucleoside diphosphate kinase B | Putative nucleoside diphosphate kinase | NME1      | NME2      | NME1&NME2 |
|-----------------------------------------------------------------------------------------------------------------------------------------------------------------------------------------------------------------------------------------------------------------------------------------------------------------------------------------------------------------------------------------------------------------------------------------------------------------------------------------------------------------------------------------------------------------------------------------------------------------------------------------------------------------------------------------------------------------------------------------------------------------------------------------------------------------------------------------------------------------------------------------------------------------------------------------------------------------------------------------------------------------------------------------------------------------------------------------------------------------------------------------------------------------------------------------------------------------------------------------------------------------------------------------------------------------------------------------------------------------------------------------------------------------------------------------------------------------------------------------------------------------------------------------------------------------------------------------------------------------------------------------------------------------------------------------------------------------------------------------------------------------------------------------------------------------------------------------------------------------------------------------------------------------------------------------------------------------------------------------------------------------------------------------------------------------------------------------------------------------------------------------------------------------------------------------------------------------------------------------------------------------------------------------------------------------------------------------------------------------------------------------------------------------------------------------------------------------------------------------------------------------------------------------------------------------------------------------------------------------------------------------------------------------------------------------------------------------------------------------------------------------------------------------------------------------------------------------------------------------------------------------------------------------------------------------------------------------------------------------------------------------------------------------------------------------------------------------------------------------------------------------------------------------------------------------------------------------------------------------------------|-------------------------------|---------------------------------|----------------------------------------|-----------|-----------|-----------|
| G3Q21P2P2392P2392-2C3Q8D8H67Z59RH0P.ET8LDJ3KP09.C06361                                                                                                                                                                                                                                                                                                                                                                                                                                                                                                                                                                                                                                                                                                                                                                                                                                                                                                                                                                                                                                                                                                                                                                                                                                                                                                                                                                                                                                                                                                                                                                                                                                                                                                                                                                                                                                                                                                                                                                                                                                                                                                                                                                                                                                                                                                                                                                                                                                                                                                                                                                                                                                                                                                                                                                                                                                                                                                                                                                                                                                                                                                                                                                                              |                               |                                 |                                        | EP21      | 461910    | 0         |
| P22626P22626-A0A087WJ02                                                                                                                                                                                                                                                                                                                                                                                                                                                                                                                                                                                                                                                                                                                                                                                                                                                                                                                                                                                                                                                                                                                                                                                                                                                                                                                                                                                                                                                                                                                                                                                                                                                                                                                                                                                                                                                                                                                                                                                                                                                                                                                                                                                                                                                                                                                                                                                                                                                                                                                                                                                                                                                                                                                                                                                                                                                                                                                                                                                                                                                                                                                                                                                                                             |                               |                                 |                                        | HNRNPAB21 | 4829000   | 36018000  |
| Splicing factor, proline- and glutamine-rich                                                                                                                                                                                                                                                                                                                                                                                                                                                                                                                                                                                                                                                                                                                                                                                                                                                                                                                                                                                                                                                                                                                                                                                                                                                                                                                                                                                                                                                                                                                                                                                                                                                                                                                                                                                                                                                                                                                                                                                                                                                                                                                                                                                                                                                                                                                                                                                                                                                                                                                                                                                                                                                                                                                                                                                                                                                                                                                                                                                                                                                                                                                                                                                                        |                               |                                 |                                        | SPQ2      | 783300    | 4682700   |
| P23284                                                                                                                                                                                                                                                                                                                                                                                                                                                                                                                                                                                                                                                                                                                                                                                                                                                                                                                                                                                                                                                                                                                                                                                                                                                                                                                                                                                                                                                                                                                                                                                                                                                                                                                                                                                                                                                                                                                                                                                                                                                                                                                                                                                                                                                                                                                                                                                                                                                                                                                                                                                                                                                                                                                                                                                                                                                                                                                                                                                                                                                                                                                                                                                                                                              |                               |                                 |                                        | PFB       | 1250400   | 5849000   |
| P23396P23396-                                                                                                                                                                                                                                                                                                                                                                                                                                                                                                                                                                                                                                                                                                                                                                                                                                                                                                                                                                                                                                                                                                                                                                                                                                                                                                                                                                                                                                                                                                                                                                                                                                                                                                                                                                                                                                                                                                                                                                                                                                                                                                                                                                                                                                                                                                                                                                                                                                                                                                                                                                                                                                                                                                                                                                                                                                                                                                                                                                                                                                                                                                                                                                                                                                       |                               |                                 |                                        |           |           |           |
| 2E9P09.E9PPU1.F2Z258.H0YCV17.H0YF3Z.3.H0YELU2.E9PQC6.E9PH4.E9PKB2.E9PS4.E9PQC2.H0Y58.E9P91                                                                                                                                                                                                                                                                                                                                                                                                                                                                                                                                                                                                                                                                                                                                                                                                                                                                                                                                                                                                                                                                                                                                                                                                                                                                                                                                                                                                                                                                                                                                                                                                                                                                                                                                                                                                                                                                                                                                                                                                                                                                                                                                                                                                                                                                                                                                                                                                                                                                                                                                                                                                                                                                                                                                                                                                                                                                                                                                                                                                                                                                                                                                                          |                               |                                 |                                        |           |           |           |
| NP                                                                                                                                                                                                                                                                                                                                                                                                                                                                                                                                                                                                                                                                                                                                                                                                                                                                                                                                                                                                                                                                                                                                                                                                                                                                                                                                                                                                                                                                                                                                                                                                                                                                                                                                                                                                                                                                                                                                                                                                                                                                                                                                                                                                                                                                                                                                                                                                                                                                                                                                                                                                                                                                                                                                                                                                                                                                                                                                                                                                                                                                                                                                                                                                                                                  |                               |                                 |                                        | RF53      | 39785000  | 22108000  |
| P23526-2P23526                                                                                                                                                                                                                                                                                                                                                                                                                                                                                                                                                                                                                                                                                                                                                                                                                                                                                                                                                                                                                                                                                                                                                                                                                                                                                                                                                                                                                                                                                                                                                                                                                                                                                                                                                                                                                                                                                                                                                                                                                                                                                                                                                                                                                                                                                                                                                                                                                                                                                                                                                                                                                                                                                                                                                                                                                                                                                                                                                                                                                                                                                                                                                                                                                                      |                               |                                 |                                        | AHCY      | 516000    | 221480    |
| P23528.E9PP50.E9PK25.GV1AA.E9PQ87.E9PU13.E9P523                                                                                                                                                                                                                                                                                                                                                                                                                                                                                                                                                                                                                                                                                                                                                                                                                                                                                                                                                                                                                                                                                                                                                                                                                                                                                                                                                                                                                                                                                                                                                                                                                                                                                                                                                                                                                                                                                                                                                                                                                                                                                                                                                                                                                                                                                                                                                                                                                                                                                                                                                                                                                                                                                                                                                                                                                                                                                                                                                                                                                                                                                                                                                                                                     |                               |                                 |                                        | CLF1      | 128340000 | 59635000  |
| P24534.C3WZM3.F8W6F5Z2G2G                                                                                                                                                                                                                                                                                                                                                                                                                                                                                                                                                                                                                                                                                                                                                                                                                                                                                                                                                                                                                                                                                                                                                                                                                                                                                                                                                                                                                                                                                                                                                                                                                                                                                                                                                                                                                                                                                                                                                                                                                                                                                                                                                                                                                                                                                                                                                                                                                                                                                                                                                                                                                                                                                                                                                                                                                                                                                                                                                                                                                                                                                                                                                                                                                           |                               |                                 |                                        | EEF182    | 6003000   | 34442000  |
| P24646P24646P24646-4C2Z2D9P4A66-3P24646-2.D3Y1T2                                                                                                                                                                                                                                                                                                                                                                                                                                                                                                                                                                                                                                                                                                                                                                                                                                                                                                                                                                                                                                                                                                                                                                                                                                                                                                                                                                                                                                                                                                                                                                                                                                                                                                                                                                                                                                                                                                                                                                                                                                                                                                                                                                                                                                                                                                                                                                                                                                                                                                                                                                                                                                                                                                                                                                                                                                                                                                                                                                                                                                                                                                                                                                                                    |                               |                                 |                                        | ACPI      | 126190000 | 7380      |
| P24528.A0A087WWZ2.P24528-2.C2NNY15-2.C2QNY15                                                                                                                                                                                                                                                                                                                                                                                                                                                                                                                                                                                                                                                                                                                                                                                                                                                                                                                                                                                                                                                                                                                                                                                                                                                                                                                                                                                                                                                                                                                                                                                                                                                                                                                                                                                                                                                                                                                                                                                                                                                                                                                                                                                                                                                                                                                                                                                                                                                                                                                                                                                                                                                                                                                                                                                                                                                                                                                                                                                                                                                                                                                                                                                                        |                               |                                 |                                        | POLR2A    | 1245100   | 990280    |
| P52505.P2505-2.D3KED9                                                                                                                                                                                                                                                                                                                                                                                                                                                                                                                                                                                                                                                                                                                                                                                                                                                                                                                                                                                                                                                                                                                                                                                                                                                                                                                                                                                                                                                                                                                                                                                                                                                                                                                                                                                                                                                                                                                                                                                                                                                                                                                                                                                                                                                                                                                                                                                                                                                                                                                                                                                                                                                                                                                                                                                                                                                                                                                                                                                                                                                                                                                                                                                                                               |                               |                                 |                                        | MCMB3     | 666190    | 430630    |
| P25311.C3EUV0                                                                                                                                                                                                                                                                                                                                                                                                                                                                                                                                                                                                                                                                                                                                                                                                                                                                                                                                                                                                                                                                                                                                                                                                                                                                                                                                                                                                                                                                                                                                                                                                                                                                                                                                                                                                                                                                                                                                                                                                                                                                                                                                                                                                                                                                                                                                                                                                                                                                                                                                                                                                                                                                                                                                                                                                                                                                                                                                                                                                                                                                                                                                                                                                                                       |                               |                                 |                                        | AZGP1     | 527680    | 384320    |
| P2538                                                                                                                                                                                                                                                                                                                                                                                                                                                                                                                                                                                                                                                                                                                                                                                                                                                                                                                                                                                                                                                                                                                                                                                                                                                                                                                                                                                                                                                                                                                                                                                                                                                                                                                                                                                                                                                                                                                                                                                                                                                                                                                                                                                                                                                                                                                                                                                                                                                                                                                                                                                                                                                                                                                                                                                                                                                                                                                                                                                                                                                                                                                                                                                                                                               |                               |                                 |                                        | RP512     | 33897000  | 19121000  |
| P25678.P2576-2.F5SGX11.B4E0W.F5H12                                                                                                                                                                                                                                                                                                                                                                                                                                                                                                                                                                                                                                                                                                                                                                                                                                                                                                                                                                                                                                                                                                                                                                                                                                                                                                                                                                                                                                                                                                                                                                                                                                                                                                                                                                                                                                                                                                                                                                                                                                                                                                                                                                                                                                                                                                                                                                                                                                                                                                                                                                                                                                                                                                                                                                                                                                                                                                                                                                                                                                                                                                                                                                                                                  |                               |                                 |                                        | P2A201    | 27342000  | 341210000 |
| P25787.C3UICK5                                                                                                                                                                                                                                                                                                                                                                                                                                                                                                                                                                                                                                                                                                                                                                                                                                                                                                                                                                                                                                                                                                                                                                                                                                                                                                                                                                                                                                                                                                                                                                                                                                                                                                                                                                                                                                                                                                                                                                                                                                                                                                                                                                                                                                                                                                                                                                                                                                                                                                                                                                                                                                                                                                                                                                                                                                                                                                                                                                                                                                                                                                                                                                                                                                      |                               |                                 |                                        | PSMA2     | 139300000 | 8104000   |
| P25788-2.P25788.G3V3W4.G3VGN4                                                                                                                                                                                                                                                                                                                                                                                                                                                                                                                                                                                                                                                                                                                                                                                                                                                                                                                                                                                                                                                                                                                                                                                                                                                                                                                                                                                                                                                                                                                                                                                                                                                                                                                                                                                                                                                                                                                                                                                                                                                                                                                                                                                                                                                                                                                                                                                                                                                                                                                                                                                                                                                                                                                                                                                                                                                                                                                                                                                                                                                                                                                                                                                                                       |                               |                                 |                                        | PSMA3     | 309510000 | 20932000  |
| P27893.H0YH1.H0YH2V1.H0YH3.H0YMA1.H0YK1.H0YMH6.H0YSD3.H0YH2.C2H0Y56.H0YH3                                                                                                                                                                                                                                                                                                                                                                                                                                                                                                                                                                                                                                                                                                                                                                                                                                                                                                                                                                                                                                                                                                                                                                                                                                                                                                                                                                                                                                                                                                                                                                                                                                                                                                                                                                                                                                                                                                                                                                                                                                                                                                                                                                                                                                                                                                                                                                                                                                                                                                                                                                                                                                                                                                                                                                                                                                                                                                                                                                                                                                                                                                                                                                           |                               |                                 |                                        |           |           |           |
| P26038                                                                                                                                                                                                                                                                                                                                                                                                                                                                                                                                                                                                                                                                                                                                                                                                                                                                                                                                                                                                                                                                                                                                                                                                                                                                                                                                                                                                                                                                                                                                                                                                                                                                                                                                                                                                                                                                                                                                                                                                                                                                                                                                                                                                                                                                                                                                                                                                                                                                                                                                                                                                                                                                                                                                                                                                                                                                                                                                                                                                                                                                                                                                                                                                                                              |                               |                                 |                                        | PSMA4     | 295730000 | 174500000 |
| P26196.B0V86                                                                                                                                                                                                                                                                                                                                                                                                                                                                                                                                                                                                                                                                                                                                                                                                                                                                                                                                                                                                                                                                                                                                                                                                                                                                                                                                                                                                                                                                                                                                                                                                                                                                                                                                                                                                                                                                                                                                                                                                                                                                                                                                                                                                                                                                                                                                                                                                                                                                                                                                                                                                                                                                                                                                                                                                                                                                                                                                                                                                                                                                                                                                                                                                                                        |                               |                                 |                                        | MSN       | 0         | 62855     |
| P26358-2.P26358.P26359-3.A3CTWY1.A3CTWY2.A3CTWY3.A3CTWY4.A3CTWY5.A3CTWY6.A3CTWY7.A3CTWY8.A3CTWY9.A3CTWY10.A3CTWY11.A3CTWY12.A3CTWY13.A3CTWY14.A3CTWY15.A3CTWY16.A3CTWY17.A3CTWY18.A3CTWY19.A3CTWY20.A3CTWY21.A3CTWY22.A3CTWY23.A3CTWY24.A3CTWY25.A3CTWY26.A3CTWY27.A3CTWY28.A3CTWY29.A3CTWY30.A3CTWY31.A3CTWY32.A3CTWY33.A3CTWY34.A3CTWY35.A3CTWY36.A3CTWY37.A3CTWY38.A3CTWY39.A3CTWY40.A3CTWY41.A3CTWY42.A3CTWY43.A3CTWY44.A3CTWY45.A3CTWY46.A3CTWY47.A3CTWY48.A3CTWY49.A3CTWY50.A3CTWY51.A3CTWY52.A3CTWY53.A3CTWY54.A3CTWY55.A3CTWY56.A3CTWY57.A3CTWY58.A3CTWY59.A3CTWY60.A3CTWY61.A3CTWY62.A3CTWY63.A3CTWY64.A3CTWY65.A3CTWY66.A3CTWY67.A3CTWY68.A3CTWY69.A3CTWY70.A3CTWY71.A3CTWY72.A3CTWY73.A3CTWY74.A3CTWY75.A3CTWY76.A3CTWY77.A3CTWY78.A3CTWY79.A3CTWY80.A3CTWY81.A3CTWY82.A3CTWY83.A3CTWY84.A3CTWY85.A3CTWY86.A3CTWY87.A3CTWY88.A3CTWY89.A3CTWY90.A3CTWY91.A3CTWY92.A3CTWY93.A3CTWY94.A3CTWY95.A3CTWY96.A3CTWY97.A3CTWY98.A3CTWY99.A3CTWY100.A3CTWY101.A3CTWY102.A3CTWY103.A3CTWY104.A3CTWY105.A3CTWY106.A3CTWY107.A3CTWY108.A3CTWY109.A3CTWY110.A3CTWY111.A3CTWY112.A3CTWY113.A3CTWY114.A3CTWY115.A3CTWY116.A3CTWY117.A3CTWY118.A3CTWY119.A3CTWY120.A3CTWY121.A3CTWY122.A3CTWY123.A3CTWY124.A3CTWY125.A3CTWY126.A3CTWY127.A3CTWY128.A3CTWY129.A3CTWY130.A3CTWY131.A3CTWY132.A3CTWY133.A3CTWY134.A3CTWY135.A3CTWY136.A3CTWY137.A3CTWY138.A3CTWY139.A3CTWY140.A3CTWY141.A3CTWY142.A3CTWY143.A3CTWY144.A3CTWY145.A3CTWY146.A3CTWY147.A3CTWY148.A3CTWY149.A3CTWY150.A3CTWY151.A3CTWY152.A3CTWY153.A3CTWY154.A3CTWY155.A3CTWY156.A3CTWY157.A3CTWY158.A3CTWY159.A3CTWY160.A3CTWY161.A3CTWY162.A3CTWY163.A3CTWY164.A3CTWY165.A3CTWY166.A3CTWY167.A3CTWY168.A3CTWY169.A3CTWY170.A3CTWY171.A3CTWY172.A3CTWY173.A3CTWY174.A3CTWY175.A3CTWY176.A3CTWY177.A3CTWY178.A3CTWY179.A3CTWY180.A3CTWY181.A3CTWY182.A3CTWY183.A3CTWY184.A3CTWY185.A3CTWY186.A3CTWY187.A3CTWY188.A3CTWY189.A3CTWY190.A3CTWY191.A3CTWY192.A3CTWY193.A3CTWY194.A3CTWY195.A3CTWY196.A3CTWY197.A3CTWY198.A3CTWY199.A3CTWY200.A3CTWY201.A3CTWY202.A3CTWY203.A3CTWY204.A3CTWY205.A3CTWY206.A3CTWY207.A3CTWY208.A3CTWY209.A3CTWY210.A3CTWY211.A3CTWY212.A3CTWY213.A3CTWY214.A3CTWY215.A3CTWY216.A3CTWY217.A3CTWY218.A3CTWY219.A3CTWY220.A3CTWY221.A3CTWY222.A3CTWY223.A3CTWY224.A3CTWY225.A3CTWY226.A3CTWY227.A3CTWY228.A3CTWY229.A3CTWY230.A3CTWY231.A3CTWY232.A3CTWY233.A3CTWY234.A3CTWY235.A3CTWY236.A3CTWY237.A3CTWY238.A3CTWY239.A3CTWY240.A3CTWY241.A3CTWY242.A3CTWY243.A3CTWY244.A3CTWY245.A3CTWY246.A3CTWY247.A3CTWY248.A3CTWY249.A3CTWY250.A3CTWY251.A3CTWY252.A3CTWY253.A3CTWY254.A3CTWY255.A3CTWY256.A3CTWY257.A3CTWY258.A3CTWY259.A3CTWY260.A3CTWY261.A3CTWY262.A3CTWY263.A3CTWY264.A3CTWY265.A3CTWY266.A3CTWY267.A3CTWY268.A3CTWY269.A3CTWY270.A3CTWY271.A3CTWY272.A3CTWY273.A3CTWY274.A3CTWY275.A3CTWY276.A3CTWY277.A3CTWY278.A3CTWY279.A3CTWY280.A3CTWY281.A3CTWY282.A3CTWY283.A3CTWY284.A3CTWY285.A3CTWY286.A3CTWY287.A3CTWY288.A3CTWY289.A3CTWY290.A3CTWY291.A3CTWY292.A3CTWY293.A3CTWY294.A3CTWY295.A3CTWY296.A3CTWY297.A3CTWY298.A3CTWY299.A3CTWY300.A3CTWY301.A3CTWY302.A3CTWY303.A3CTWY304.A3CTWY305.A3CTWY306.A3CTWY307.A3CTWY308.A3CTWY309.A3CTWY310.A3CTWY311.A3CTWY312.A3CTWY313.A3CTWY314.A3CTWY315.A3CTWY316.A3CTWY317.A3CTWY318.A3CTWY319.A3CTWY320.A3CTWY |                               |                                 |                                        |           |           |           |

[illegible]

[illegible]











|                                                                                                                                                                                                                                  |                         |             |            |            |            |             |             |             |              |
|----------------------------------------------------------------------------------------------------------------------------------------------------------------------------------------------------------------------------------|-------------------------|-------------|------------|------------|------------|-------------|-------------|-------------|--------------|
| Gamma-tubulin complex component 6                                                                                                                                                                                                | TUBGCP6                 | 0           | 0          | 0          | 0          | 0           | 0           | NaN         | NaN          |
| Ezrin                                                                                                                                                                                                                            | EZR                     | 0           | 8.9207E-05 | 8.5534E-05 | 0.00010333 | 6.95772E-05 | 0.00010208  | 0.939067468 | 0.224806593  |
| Polyadenylate-binding protein;Polyadenylate-binding protein 1;Polyadenylate-binding protein 3                                                                                                                                    | PABPC1;PABPC3           | 0.008961482 | 0.01805715 | 0.02478217 | 0.01345052 | 0.037434537 | 0.029993185 | 0.35339108  | 0.732064125  |
| Brain-specific angiogenesis inhibitor 1-associated protein 2-like protein 1                                                                                                                                                      | BAIAP2L1                | 0.000121263 | 2.4559E-05 | 0.0001884  | 0          | 0           | 0           | NaN         | NaN          |
| Neurofilament medium polypeptide                                                                                                                                                                                                 | NEFM                    | 0.040532415 | 0.05718727 | 0.12567358 | 0.01317314 | 0.011391891 | 0.010742284 | 0.025387036 | -2.327668614 |
| Serine/threonine-protein phosphatase;Serine/threonine-protein phosphatase 2B catalytic subunit alpha isoform;Serine/threonine-protein phosphatase 2B catalytic subunit beta isoform                                              | PPP3CA;PPP3CB           | 0.000221089 | 0          | 0.00011135 | 0          | 0.000159976 | 0           | 0.957859558 | 0.027971647  |
| Ras-related protein Rab-11A;Ras-related protein Rab-11B                                                                                                                                                                          | RAB11A;RAB11B           | 0.004750644 | 0.00593112 | 0.00691871 | 0.00210547 | 0.001456048 | 0.001677461 | 0.052023186 | -1.822025579 |
| Treacle protein                                                                                                                                                                                                                  | TCOF1                   | 1.63739E-05 | 0.00014409 | 0.0004201  | 0.00012779 | 0.00049339  | 0.00035202  | 0.364237457 | 1.288677171  |
| Serine/threonine-protein kinase MARK2;MAP/microtubule affinity-regulating kinase 3;MAP/microtubule affinity-regulating kinase 4;Serine/threonine-protein kinase MARK1                                                            | MARK2;MARK4;MARK3;MARK1 | 4.3344E-05  | 3.0403E-05 | 3.8332E-05 | 0          | 3.92682E-05 | 3.58407E-05 | 0.972232128 | -0.031080423 |
| Basic leucine zipper and W2 domain-containing protein 2                                                                                                                                                                          | BZW2                    | 0.002927052 | 0.00341798 | 0.00627199 | 0.00120389 | 0.003428698 | 0.002114302 | 0.177341938 | -0.692964182 |
| Golgin subfamily B member 1                                                                                                                                                                                                      | GOLGB1                  | 0.000753611 | 0.000397   | 0.00053634 | 0.00017764 | 0.000228687 | 0           | 0.096657014 | -1.411993248 |
| Casein kinase II subunit alpha 3;Casein kinase II subunit alpha                                                                                                                                                                  | CSNK2A1;CSNK2A3         | 0.000995689 | 0.0012864  | 0.0019989  | 0.00145772 | 0.004512932 | 0.003372408 | 0.163082355 | 1.390437532  |
| Protein FAM193A                                                                                                                                                                                                                  | FAM193A                 | 0.000687605 | 0.00032851 | 0.0012213  | 0.00081318 | 0.00319618  | 0.000705676 | 0.350768275 | 0.241996471  |
| Microtubule-associated protein;Microtubule-associated protein 4                                                                                                                                                                  | MAP4                    | 0.001796495 | 0.00195352 | 0.00513225 | 0.00703962 | 0.012975449 | 0.009340668 | 0.056268157 | 2.257448225  |
| Cytoplasmic FMR1-interacting protein 2                                                                                                                                                                                           | CVIFP2                  | 0.000783562 | 0.00069361 | 0.00122313 | 8.5211E-05 | 0.000420836 | 0.000117256 | 0.06147979  | -2.740387527 |
| Protein SDA1 homolog                                                                                                                                                                                                             | SDAD1                   | 0.000283277 | 0.00047829 | 0.00143958 | 0.00065369 | 0.0022641   | 0.001806991 | 0.233829336 | 1.917631788  |
| Cleavage stimulation factor subunit 2                                                                                                                                                                                            | CSFT2                   | 0.000344833 | 0.00047203 | 0.0006264  | 0.00034518 | 0.000508673 | 0.000218752 | 0.39461205  | -0.451525498 |
| Eukaryotic translation initiation factor 4B                                                                                                                                                                                      | EIF4B                   | 0.01367596  | 0.01507066 | 0.01787469 | 0.00890136 | 0.02066005  | 0.012462857 | 0.683300645 | -0.274107576 |
| Dynactin subunit 1                                                                                                                                                                                                               | DCTN1;DKFZp686E0752     | 0.00045159  | 0.00048595 | 0.00052964 | 0.0017266  | 0.002084756 | 0.000383429 | 0.20985437  | 1.829050677  |
| Chromosome transmission fidelity protein 18 homolog;Tubulin-specific chaperone E                                                                                                                                                 | CHTF18;TBCE             | 0.000188249 | 4.7904E-05 | 0.0002023  | 4.3077E-05 | 6.82378E-05 | 7.46295E-05 | 0.235488613 | -1.463999161 |
| Nascent polypeptide-associated complex subunit alpha;Nascent polypeptide-associated complex subunit alpha, muscle-specific form                                                                                                  | NACA                    | 0.028588064 | 0.04914791 | 0.11670472 | 0.01912487 | 0.107493872 | 0.056276896 | 0.872008388 | 0.195412631  |
| THO complex subunit 4                                                                                                                                                                                                            | ALYREF                  | 0           | 0          | 0.00116157 | 0.00023272 | 0.005127309 | 0           | 0.970615194 | -0.088653395 |
| DNA-directed RNA polymerase II subunit RPB4                                                                                                                                                                                      | POLR2D                  | 0.002696675 | 0.00092361 | 0.0041833  | 0          | 0.001997027 | 0.001405433 | 0.688085975 | -0.686747402 |
| Multifunctional protein                                                                                                                                                                                                          |                         |             |            |            |            |             |             |             |              |
| ADE2;Phosphoribosylaminoimidazole-succinocarboxamide synthase;Phosphoribosylaminoimidazole carboxylase                                                                                                                           | PAICS                   | 0.00041768  | 0.00025956 | 0.00047403 | 0.00012882 | 0.000316256 | 0.000236686 | 0.194965353 | -0.819423691 |
| Translation initiation factor eIF-2B subunit epsilon                                                                                                                                                                             | EIF2B5                  | 0.000570877 | 0.00113242 | 0.00154416 | 0.00158104 | 0.004901354 | 0.003061046 | 0.107990496 | 1.434616865  |
| Heterogeneous nuclear ribonucleoprotein                                                                                                                                                                                          |                         |             |            |            |            |             |             |             |              |
| H;Heterogeneous nuclear ribonucleoprotein H, N-terminally processed;Heterogeneous nuclear ribonucleoprotein H2                                                                                                                   | HNRNPH1;HNRNPH2         | 0.022698466 | 0.01658118 | 0.03322769 | 0.02917701 | 0.030532674 | 0.019028722 | 0.792331574 | 0.362237443  |
| Structural maintenance of chromosomes protein;Structural maintenance of chromosomes protein 4                                                                                                                                    | SMC4                    | 0.001684974 | 0.00173726 | 0.00420577 | 0.00173381 | 0.005029132 | 0.00233395  | 0.728485431 | 0.425964122  |
| Heat shock 70 kDa protein 4L                                                                                                                                                                                                     | HSPA4L                  | 5.88456E-05 | 4.0986E-05 | 8.8866E-05 | 2.2243E-05 | 3.07215E-05 | 4.95862E-05 | 0.170633218 | -0.937685888 |
| Ankyrin repeat and KH domain-containing protein 1                                                                                                                                                                                | ANKHD1                  | 0           | 0          | 0.01023838 | 0          | 0.002714268 | 0           | NaN         | NaN          |
| Signal recognition particle 9 kDa protein                                                                                                                                                                                        | SRP9                    | 0           | 0          | 0.01023838 | 0          | 0.002714268 | 0           | NaN         | -1.915352096 |
| Far upstream element-binding protein 1                                                                                                                                                                                           | FUBP1                   | 0.000731945 | 0.00067439 | 0.00092218 | 0.00054913 | 0.000695571 | 0.000480985 | 0.427404792 | -0.414598024 |
| Striatin-3                                                                                                                                                                                                                       | STRN3                   | 0.000703281 | 0.00011169 | 0.00027621 | 0          | 0           | 0           | NaN         | NaN          |
| Nucleolar protein 14                                                                                                                                                                                                             | NOP14                   | 4.75165E-06 | 0          | 9.4374E-05 | 2.2977E-05 | 0.000365827 | 0.000274871 | 0.304336852 | 3.698238599  |
| Protein FAM98A                                                                                                                                                                                                                   | FAM98A                  | 0.000436345 | 0.00074261 | 0.00144333 | 6.5571E-05 | 0.001548198 | 0.001209756 | 0.706668091 | 0.704029733  |
| Vesicle-fusing ATPase                                                                                                                                                                                                            | NSF                     | 0.000438428 | 9.4429E-05 | 0.00048692 | 0          | 0           | 0           | NaN         | NaN          |
| Syndecan-1                                                                                                                                                                                                                       | SDC1                    | 0           | 0          | 0.00040991 | 0          | 0           | 0           | NaN         | NaN          |
| Band 4.1-like protein 2                                                                                                                                                                                                          | EPB41L2                 | 0.000229448 | 0.00011254 | 0.00040779 | 0          | 3.3699E-05  | 5.18022E-05 | 0.060856853 | -2.457235751 |
| BRO1 domain-containing protein BROX                                                                                                                                                                                              | BROX                    | 0.000400364 | 8.5721E-05 | 0.00040893 | 0          | 0           | 0           | NaN         | NaN          |
| ATP-dependent 6-phosphofructokinase, liver type                                                                                                                                                                                  | PFKL                    | 0.015221622 | 0.01806867 | 0.01838615 | 0.00124281 | 0.002575106 | 0.000917204 | 0.013229283 | -3.861812656 |
| Probable ATP-dependent RNA helicase DDX10                                                                                                                                                                                        | DDX10                   | 2.1511E-05  | 2.5307E-05 | 4.1558E-05 | 6.1274E-05 | 0.000325257 | 0.00017366  | 0.063786273 | 2.778645688  |
|                                                                                                                                                                                                                                  | CYHR1                   | 0           | 0          | 0          | 0          | 0           | 0           | NaN         | NaN          |
| Mitogen-activated protein kinase;Mitogen-activated protein kinase 3                                                                                                                                                              | MAPK3                   | 0.000662692 | 0.00051468 | 0.00056564 | 0.00016909 | 0.000163954 | 0.000473917 | 0.099448175 | -1.742086823 |
| Methylosome subunit pICn                                                                                                                                                                                                         | CLNS1A                  | 0           | 0.0005046  | 0.00092821 | 0          | 0.000153132 | 0           | 0.026242617 | -2.160015113 |
| Transferrin receptor protein 1;Transferrin receptor protein 1, serum form                                                                                                                                                        | TFR1                    | 0.000877393 | 0.00021589 | 0.00086707 | 0          | 0           | 0           | NaN         | NaN          |
| Protein arginine N-methyltransferase 1                                                                                                                                                                                           | PRMT1                   | 0.003380473 | 0.00408406 | 0.00525418 | 0.00426662 | 0.006166807 | 0.005224029 | 0.582326689 | 0.355159904  |
| Serpin H1                                                                                                                                                                                                                        | SERPINH1                | 0.000511695 | 0.00030286 | 0.00074703 | 0          | 0.000281151 | 0           | 0.132401517 | -0.863938958 |
| Nucleolar transcription factor 1                                                                                                                                                                                                 | UBTF                    | 1.40673E-05 | 0          | 0.00016814 | 3.0695E-05 | 0           | 0           | 0.737628845 | -0.663977463 |
| NEDD8                                                                                                                                                                                                                            | NEDD8;NEDD8-MDP1        | 0.004326895 | 0.00828316 | 0.00924742 | 0.00496221 | 0.008516361 | 0.007042547 | 0.926751073 | -0.234083447 |
| Ubiquitin-40S ribosomal protein S27a;Ubiquitin-40S ribosomal protein S27a;Ubiquitin-60S ribosomal protein L40;Ubiquitin-60S ribosomal protein L40;Polyubiquitin-8;Ubiquitin;Polyubiquitin-C;Ubiquitin                            | RPS27A;UBB;UBC;UBA52    | 0.641977382 | 0.80475243 | 0.85935702 | 0.13568779 | 0.211221387 | 0.216726706 | 0.038571398 | -1.929789115 |
| Probable RNA-binding protein EIF1AD                                                                                                                                                                                              | EIF1AD                  | 0.002828519 | 0.00062866 | 0.00068629 | 0.0011281  | 0.001346218 | 0           | 0.92319759  | 0.505155015  |
| 60S ribosomal protein L27a                                                                                                                                                                                                       | RPL27A                  | 0.097626246 | 0.13016853 | 0.20514202 | 0.0177079  | 0.234633878 | 0.180342712 | 0.66005464  | -0.470360389 |
| Small acidic protein                                                                                                                                                                                                             | C11orf58;SMAF           | 0.01196395  | 0.00941798 | 0.01507718 | 0.00042393 | 0.008182585 | 0.003155681 | 0.143252748 | 2.056342953  |
|                                                                                                                                                                                                                                  | HSPA8                   | 0.00190365  | 0.0015191  | 9.3442E-05 | 0.00214127 | 0.002297049 | 0.003661571 | 0.234228987 | 0.59656099   |
| Lysine-rich nucleolar protein 1                                                                                                                                                                                                  | KNOP1                   | 5.51008E-05 | 0          | 0.00017027 | 0          | 0           | 0           | NaN         | NaN          |
| Mitochondrial chaperone BCS1                                                                                                                                                                                                     | BCS1L                   | 0           | 0.0002221  | 0.00057977 | 0          | 0           | 0           | NaN         | NaN          |
| Ribosomal RNA-processing protein 8                                                                                                                                                                                               | RRP8                    | 0           | 0.00051158 | 0.00010334 | 0.00133215 | 0.002896291 | 0.001805627 | 0.063977199 | 2.973230545  |
| Prefoldin subunit 4                                                                                                                                                                                                              | PFND4                   | 0           | 0          | 0.00031233 | 0.00028681 | 0.000379623 | 0.000635576 | 0.317806528 | 0.281496253  |
| 40S ribosomal protein S30                                                                                                                                                                                                        | FAU                     | 0.003371602 | 0.01126557 | 0.01002649 | 0.00012456 | 0.006144306 | 0.005639762 | 0.319721766 | -0.830109884 |
| WD repeat-containing protein 74                                                                                                                                                                                                  | WDR74                   | 0.000754619 | 0          | 0.00089841 | 0.00159523 | 0.0048968   | 0.003292571 | 0.081693675 | 1.929987838  |
| Gamma-tubulin complex component 2                                                                                                                                                                                                | TUBGCP2                 | 0.000308353 | 0.00012757 | 0.00065747 | 2.8874E-05 | 0           | 0           | 0.026324327 | -3.416749988 |
| Ras GTPase-activating-like protein IQGAP3                                                                                                                                                                                        | IQGAP3                  | 0           | 0          | 0          | 0          | 0           | 0           | NaN         | NaN          |
| NSFL1 cofactor p47                                                                                                                                                                                                               | NSFL1C                  | 0.000608554 | 0.00040205 | 0.00073289 | 0          | 0.000313336 | 0           | 0.108161327 | -0.957674752 |
| Non-histone chromosomal protein HMG-14                                                                                                                                                                                           | HMGN1                   | 0           | 0          | 0          | 0          | 0           | 0           | NaN         | NaN          |
| tRNA (uracil-5-)-methyltransferase homolog A                                                                                                                                                                                     | TRMT2A                  | 0.000915575 | 0.00045651 | 0.00137739 | 0.00045765 | 0.002514432 | 0.002054133 | 0.496418115 | 1.16577962   |
| 60S ribosomal protein L35                                                                                                                                                                                                        | RPL35                   | 0.238775053 | 0.27552601 | 0.56192346 | 0.28327689 | 1.00273235  | 1.049362282 | 0.243509932 | 1.863676134  |
| BTB/POZ domain-containing adapter for CUL3-mediated RhoA degradation protein 3                                                                                                                                                   | KCTD10                  | 0.00058812  | 0.00085459 | 0.00086125 | 0          | 0.000172835 | 0.0003631   | 0.079969525 | -1.77035127  |
| Chromodomain-helicase-DNA-binding protein 4                                                                                                                                                                                      | CHD4                    | 3.45146E-05 | 8.8232E-06 | 0.00015909 | 0          | 8.35282E-05 | 3.04605E-05 | 0.797319917 | 0.547394722  |
| Proteolipid protein 2                                                                                                                                                                                                            | PLP2                    | 0.000694155 | 0.00021186 | 0.00093771 | 0          | 0           | 0           | NaN         | NaN          |
| DNA-binding protein SMUBP-2                                                                                                                                                                                                      | IGHMBP2                 | 0           | 0.00021425 | 0.00019492 | 0          | 0.000147828 | 0.000191082 | 0.680139408 | -0.282030248 |
| Multifunctional methyltransferase subunit TRMT112-like protein                                                                                                                                                                   | TRMT112                 | 0.006437689 | 0.00724464 | 0.00987396 | 0.00741106 | 0.008082801 | 0.008707623 | 0.913889728 | 0.157942323  |
| Diablo homolog, mitochondrial                                                                                                                                                                                                    | DIABLO                  | 0.000333109 | 0.00089779 | 0.00162855 | 0          | 0.000671288 | 0           | 0.758139636 | -0.419447781 |
| CD2-associated protein                                                                                                                                                                                                           | CD2AP                   | 0.000277545 | 0.00010579 | 0.00056081 | 0          | 0           | 0           | NaN         | NaN          |
| Dedicator of cytokinesis protein 4                                                                                                                                                                                               | DOCK4                   | 0           | 0          | 1.5762E-05 | 0          | 0           | 0           | NaN         | NaN          |
| Protein C10                                                                                                                                                                                                                      | C12orf57                | 0.001428955 | 0.00045061 | 0.00190209 | 0          | 0.000681735 | 0           | 0.352973632 | -1.067677527 |
| Constitutive coactivator of peroxisome proliferator-activated receptor gamma                                                                                                                                                     | FAM120B                 | 0.000455235 | 0.00041471 | 0.0005168  | 0.00042365 | 0.000727662 | 0.000314225 | 0.994923429 | -0.103731801 |
| Striatin-4                                                                                                                                                                                                                       | STRN4                   | 0.000598589 | 0.00024166 | 0.00033444 | 0          | 0.000156373 | 0           | 0.064164889 | -1.096764603 |
| 4F2 cell-surface antigen heavy chain                                                                                                                                                                                             | SLC3A2                  | 0.000192431 | 0.00012997 | 0.00069015 | 0          | 0.000170718 | 0           | 0.45555267  | -0.172726051 |
| Gephyrin;Molybdopterin adenylyltransferase;Molybdopterin molybdenumtransferase                                                                                                                                                   | GPBN                    | 0           | 0          | 0.00018297 | 0          | 0           | 0           | NaN         | NaN          |
| DNA polymerase;DNA polymerase epsilon catalytic subunit A                                                                                                                                                                        | POLE                    | 3.65295E-05 | 3.1453E-05 | 0.00018922 | 9.1569E-06 | 4.44462E-05 | 5.34554E-05 | 0.38484533  | 0.282998072  |
| tRNA pseudouridine synthase;tRNA pseudouridine synthase A, mitochondrial                                                                                                                                                         | PUS1                    | 0.000104977 | 9.4395E-05 | 0.00098484 | 0.00026913 | 0.000878879 | 0.000804498 | 0.302080527 | 2.93801556   |
| C-1-tetrahydrofolate synthase, cytoplasmic;Methylenetetrahydrofolate dehydrogenase;Methylenetetrahydrofolate cyclohydrolase;Formyltetrahydrofolate synthetase;C-1-tetrahydrofolate synthase, cytoplasmic, N-terminally processed | MTHFD1                  | 0.00095734  | 0.00076706 | 0.00164216 | 0.00089345 | 0.002536666 | 0.001203427 | 0.523499674 | 0.330045335  |
| Elongator complex protein 1                                                                                                                                                                                                      | IKBKAP                  | 0.00045449  | 0.00035596 | 0.00078077 | 0.00034004 | 0.00058546  | 0.000228099 | 0.388090263 | -0.418535601 |
| ATP-dependent RNA helicase DDX55                                                                                                                                                                                                 | DDX55                   | 0.000410749 | 0.00034702 | 0.00123107 | 0.00094032 | 0.002165789 | 0.001160101 | 0.160949808 | 1.497921446  |











|                                                                          |             |             |            |            |            |             |             |             |               |
|--------------------------------------------------------------------------|-------------|-------------|------------|------------|------------|-------------|-------------|-------------|---------------|
| Rab GDP dissociation inhibitor beta/Rab GDP dissociation inhibitor alpha | GD2/GD11    | 0.000179549 | 0.00023154 | 0.00217645 | 0.00036292 | 0.000593308 | 0.000120092 | 0.685182444 | 0.648390114   |
| Hsc70-interacting protein/Putative protein FAM10A5                       | ST13/ST13P5 | 0.004163028 | 0.00348404 | 0.00812595 | 0.00181842 | 0.00673752  | 0.004052965 | 0.57506911  | -0.038655545  |
| Dynamain-2                                                               | DNM2        | 0.000432957 | 0.00049493 | 0.00048956 | 0.00019954 | 0.000339749 | 0.000465427 | 0.355702062 | -0.349814421  |
| Cyclin-dependent kinase 9                                                | CDK9        | 0.001105867 | 0.00142249 | 0.00153395 | 0.00174897 | 0.000983271 | 0.000534281 | 0.41079913  | -0.403752441  |
| T-complex protein 1 subunit theta                                        | CC78        | 0.009015228 | 0.0058523  | 0.01555119 | 0.0121002  | 0.005842782 | 0.0047490   | 0.443038927 | -0.6030713298 |
| T-complex protein 1 subunit delta                                        | CC74        | 0.002739447 | 0.00204459 | 0.00393022 | 0.00628297 | 0.005372283 | 0.005693986 | 0.135224116 | -0.335958171  |
| Annexin A11                                                              | ANXA11      | 0.002831542 | 0.00272909 | 0.00371943 | 4.3487E-05 | 0.000195711 | 0           | 0.017015066 | -4.93893385   |
| Fragile X mental retardation syndrome-related protein 2                  | FMR2        | 0           | 0          | 0.00079408 | 0.00024088 | 0.00114606  | 0.00623038  | 0.476028674 | -0.349972467  |
| 26S proteasome non-ATPase regulatory subunit 6                           | PSMD6       | 0.288791849 | 0.27408144 | 0.38270162 | 0.0648234  | 0.065257631 | 0.063421026 | 0.032280468 | -1.22032829   |
| B-cell receptor-associated protein 31                                    | BCAP31      | 0.00038316  | 0.00044376 | 0.00102411 | 0          | 0.004779728 | 0           | 0.67709515  | 0.148632821   |
| 26S proteasome non-ATPase regulatory subunit 13                          | PSMD13      | 0.363525921 | 0.41632567 | 0.48323135 | 0.06828038 | 0.089973436 | 0.078940707 | 0.027224017 | -2.398632055  |
| Heterogeneous nuclear ribonucleoprotein A3                               | HNRNPA3     | 0.003901243 | 0.00391982 | 0.0067618  | 0.00711272 | 0.01716157  | 0.009577062 | 0.112345289 | 1.288797207   |
| 6-phosphogluconate dehydrogenase, decarboxylating                        | PGC         | 0.68567E-05 | 3.9771E-05 | 0.00028541 | 0          | 0.00079408  | 0.57469E-05 | 0.559676914 | -0.020137268  |
| Heterogeneous nuclear ribonucleoprotein M                                | HNRNPM      | 0.004309372 | 0.0050618  | 0.00601945 | 0.00644649 | 0.011727944 | 0.010823484 | 0.171652578 | 1.11238405    |
| Importin subunit alpha-1                                                 | KPNA2       | 0.006644833 | 0.00851471 | 0.01500228 | 0.00161737 | 0.004345508 | 0.003932269 | 0.0669139   | -1.327706309  |
| Importin subunit alpha-5                                                 | KPNA1       | 0.00297951  | 0.00312038 | 0.00489241 | 0.00294608 | 0.004411654 | 0.002757862 | 0.793852032 | -0.082923628  |
| Nuclear cap-binding protein subunit 2                                    | NCBP2       | 0.007135259 | 0.00985188 | 0.01580784 | 0.00305521 | 0.009636356 | 0.005924837 | 0.21232655  | -0.733623445  |
| Rap1 GTPase-GDP dissociation stimulator 1                                | RAP1GDS1    | 0           | 4.8997E-05 | 0.00022509 | 5.0966E-05 | 0           | 0           | 0.389780281 | -1.043026349  |
| Heterogeneous nuclear ribonucleoprotein F                                | HNRF        | 0.018577427 | 0.02309139 | 0.04050324 | 0.01120142 | 0.035947817 | 0.015033979 | 0.42967168  | -0.668867748  |
| F-actin-mismatch repair protein Msh6                                     | MSH6        | 0.00200084  | 0.00190537 | 0.00467148 | 0.0008935  | 0.002915846 | 0.001513407 | 0.316599082 | -0.402805782  |
| Actin-capping protein subunit alpha-1                                    | CAPZ1       | 0.00169298  | 0.00112907 | 0.00231473 | 0.00030404 | 0.00678185  | 0.000843715 | 0.077269208 | -1.31981415   |
| ATP-citrate synthase                                                     | ACLY        | 0.001928395 | 0.00227719 | 0.00421892 | 0.00510119 | 0.003854489 | 0.00186052  | 0.664600551 | -0.29154877   |
| Methionine aminopeptidase 1                                              | METAP1      | 0.000604412 | 0.00050041 | 0.00097406 | 0          | 0.000739288 | 0           | 0.704606609 | 0.290604192   |
| Coatomer subunit beta                                                    | COPB1       | 0.000217546 | 9.3728E-05 | 0.00033563 | 0          | 0.000123626 | 8.92416E-05 | 0.293277706 | -1.04964214   |
| Coatomer subunit alpha/Xenin-Prorenin                                    | COPA        | 0.000598813 | 0.00049064 | 0.0013087  | 0.00010937 | 0.000287191 | 0.000164921 | 0.051725575 | -1.860330428  |
| Arginine--tRNA ligase, cytoplasmic                                       | RARS        | 0.003260105 | 0.00421138 | 0.00845456 | 0.00581369 | 0.014269833 | 0.008696135 | 0.201774803 | 1.045482932   |
| Tyrosine--tRNA ligase, cytoplasmic                                       | YARS        | 0.000215183 | 0.00044108 | 0.00461613 | 0.00699887 | 0.01716031  | 0.015028527 | 0.44548448  | 2.639955129   |
| N-terminally processed                                                   | DI02        | 0.017020409 | 0.00973707 | 0.01241575 | 0.00056225 | 0.000827621 | 0.000643151 | 0.010531263 | -4.270        |











|                                                     |            |             |            |            |            |             |             |             |              |
|-----------------------------------------------------|------------|-------------|------------|------------|------------|-------------|-------------|-------------|--------------|
| Nuclear migration protein nudC                      | NUDC       | 0.00197755  | 0.00191668 | 0.00316787 | 0.00111165 | 0.002017519 | 0.000988453 | 0.193052133 | -0.831012839 |
| Cofilin-2                                           | CFL2       | 0.025300078 | 0.00737119 | 0.01242762 | 0          | 0.000710759 | 0.000478804 | 0.015308867 | -4.413008274 |
| Phenylalanine--tRNA ligase alpha subunit            | FARSA      | 0.004500224 | 0.00684759 | 0.0158261  | 0.01030963 | 0.031850632 | 0.016538993 | 0.192220413 | 1.272203801  |
| Developmentally-regulated GTP-binding protein 1     | DRG1       | 0.000711487 | 0.0020492  | 0.00549201 | 0.0029105  | 0.007127952 | 0.004606562 | 0.289419545 | 1.168630338  |
| Nck-associated protein 1                            | NCKAP1     | 0.000622103 | 0.00078355 | 0.00181158 | 0.00025417 | 0.000348026 | 0.000184584 | 0.049412619 | -1.624218084 |
| Exosome complex exonuclease RRP44                   | DIS3       | 0.000833221 | 0.0010738  | 0.00160243 | 0.00133    | 0.004752548 | 0.002886379 | 0.139022443 | 1.426536781  |
| RNA 3-terminal phosphate cyclase-like protein       | RCL1       | 0           | 5.3212E-05 | 0.00020661 | 0.00011348 | 0.001347424 | 0.001104761 | 0.22826983  | 3.397294022  |
| Probable ATP-dependent RNA helicase DDX52           | DDX52      | 0.00023564  | 0          | 0.00028165 | 0.00056255 | 0.001072541 | 0.000163861 | 0.457602698 | 1.126745062  |
| Translation machinery-associated protein 7          | TMA7       | 0.011217109 | 0.01470847 | 0.02946844 | 0.01771542 | 0.065563011 | 0.04149742  | 0.198104331 | 1.496374559  |
| Nucleolar protein 58                                | NOP58      | 0.000204165 | 0.00026773 | 0.00077348 | 0.00071069 | 0.001793708 | 0.000713465 | 0.143015709 | 1.414080017  |
| U6 snRNA-associated Sm-like protein LSM2            | LSM2       | 0.000481463 | 0.00088383 | 0.00207535 | 0.00049343 | 0.002219633 | 0           | 0.920311857 | 0.24377749   |
| Splicing factor 3B subunit 6                        | SF3B6      | 0.001491714 | 0.00176112 | 0.00156845 | 0.00494522 | 0.002959912 | 0.001584111 | 0.186904082 | 0.916211066  |
| Nucleolar protein 16                                | NOP16      | 0.001040925 | 0.00096587 | 0.00055235 | 0.00523346 | 0.011492479 | 0.006826989 | 0.015857461 | 2.821341029  |
| Serine-threonine kinase receptor-associated protein | STRAP      | 0.007677192 | 0.00443588 | 0.0118988  | 0.00255335 | 0.008446311 | 0.005150813 | 0.383179581 | -0.575778565 |
| tRNA-splicing ligase RtcB homolog                   | RTC8       | 0.003657933 | 0.00449388 | 0.0074531  | 0.00626824 | 0.01451762  | 0.011072924 | 0.140620604 | 1.30100402   |
| F-box only protein 7                                | FBXO7      | 0.006048035 | 0.00938951 | 0.00727847 | 0.00206214 | 0.004722144 | 0.00512102  | 0.139756251 | -0.624193773 |
| Nucleolar complex protein 2 homolog                 | NOC2L      | 0.000366017 | 0.00035827 | 0.00090288 | 0.00203236 | 0.003953336 | 0.003331516 | 0.025515318 | 3.18619626   |
| 60S ribosomal protein L36                           | RPL36      | 0.057703505 | 0.03544436 | 0.06013152 | 0.03079288 | 0.087416456 | 0.041033979 | 0.928348547 | -0.491839896 |
| Deoxynucleoside triphosphate triphosphohydrolase    |            |             |            |            |            |             |             |             |              |
| SAMHD1                                              | SAMHD1     | 0.000555263 | 0.00101829 | 0.0030685  | 0.00037064 | 0.001538019 | 0.000552741 | 0.429289828 | -0.881468702 |
| HBS1-like protein                                   | HBS1L      | 0.000558946 | 0.00056758 | 0.00107444 | 0.0009958  | 0.001629097 | 0.00246714  | 0.110420893 | 1.521174307  |
| Talin-1                                             | TLN1       | 6.7484E-05  | 2.4447E-05 | 6.3979E-05 | 4.8065E-05 | 4.8846E-05  | 3.35527E-05 | 0.80238431  | -0.412608723 |
| ATR-interacting protein                             | ATRIP      | 0           | 0          | 0          | 0          | 0.001448413 | 0.00156567  | NaN         | NaN          |
| Probable RNA-binding protein 19                     | RBM19      | 0           | 0          | 0          | 0          | 0           | 0           | NaN         | NaN          |
| Myotubularin-related protein 5                      | SBF1       | 0           | 0          | 0          | 0          | 6.36691E-05 | 6.73508E-05 | NaN         | NaN          |
| Ribosomal biogenesis protein LAS1L                  | LAS1L      | 0.000329403 | 0          | 8.4779E-05 | 0.00033019 | 0.000384391 | 0.000144529 | 0.519282312 | 0.982494227  |
| E3 ubiquitin-protein ligase ARIH1                   | ARIH1      | 0.000635315 | 0.00073696 | 0.00092511 | 0.00068986 | 0.001281017 | 0.00112879  | 0.467572424 | 0.615114976  |
| U6 snRNA-associated Sm-like protein LSM4            | LSM4       | 0.001503863 | 0.00175243 | 0.0033498  | 0.00358168 | 0.005931879 | 0.001556051 | 0.385720677 | 1.031276337  |
| FACT complex subunit SPT16                          | SUPT16H    | 6.71761E-05 | 8.8825E-05 | 0.00034413 | 1.915E-05  | 2.43795E-05 | 8.85542E-05 | 0.157485634 | -1.865305367 |
| Protein FAM107B                                     | FAM107B    | 0.000584817 | 0.00053383 | 0.00055399 | 0          | 0           | 0           | NaN         | NaN          |
| CDKN2AIP N-terminal-like protein                    | CDKN2AIPNL | 0           | 0          | 0          | 0.00055781 | 0.000566119 | 0           | NaN         | NaN          |
| Nucleolar and coiled-body phosphoprotein 1          | NOLC1      | 0           | 0.00335015 | 0.00325263 | 0          | 0           | 0           | NaN         | NaN          |
| Serine/threonine-protein kinase MRCK beta           | CDC42BPB   | 4.63358E-05 | 3.9889E-05 | 8.8946E-05 | 0          | 3.99325E-05 | 0           | 0.26510075  | -0.214563885 |
| RNA-binding protein 8A                              | RBM8A      | 0.002931475 | 0.00132388 | 0.01197278 | 0.00061072 | 0.003392668 | 0.001560277 | 0.323575882 | -0.909824576 |
| Ubiquitin carboxyl-terminal hydrolase 16            | USP16      | 0.000811555 | 0.00077554 | 0.00138223 | 0.00173972 | 0.002260618 | 0.001332528 | 0.176977251 | 1.100093524  |
| Coatomer subunit gamma-1                            | COPG1      | 0.000147615 | 0.00042807 | 0.00026292 | 0          | 0.000234406 | 0.000145532 | 0.501273784 | -0.509445448 |
| Cilia- and flagella-associated protein 20           | CFAP20     | 0.000386916 | 0.00029781 | 0.00027304 | 0.0001302  | 0.000601264 | 0.000588083 | 0.824981534 | 0.9816179    |
| Wiskott-Aldrich syndrome protein family member 2    | WASF2      | 0.000239962 | 0.0003324  | 0.00055141 | 5.8341E-05 | 0.000258743 | 0.000137118 | 0.136410963 | -1.27749373  |
|                                                     | PSMC3      | 0.339430075 | 0.31323145 | 0.24571194 | 0.10542493 | 0.048481804 | 0.039692338 | 0.029543906 | -2.691713768 |



|                                                                     |                      |            |            |            |             |             |             |         |              |
|---------------------------------------------------------------------|----------------------|------------|------------|------------|-------------|-------------|-------------|---------|--------------|
| 26S proteasome non-ATPase regulatory subunit 8                      | PSMD8                | 0.27044004 | 0.27629017 | 0.2692666  | 0.047377305 | 0.055778787 | 0.05661182  | 0.02907 | -2.2775203   |
| Ras-related protein Rab-1A;Ras-related protein Rab-18;Putative Ra:  | RAB1A;RAB18;RAB1C    | 0.00393136 | 0.00561175 | 0.00603078 | 0.00054288  | 0.001714282 | 0.000864706 | 0.02835 | -2.698167849 |
| Ras-related protein Rab-7a                                          | RAB7A                | 0.00244463 | 0.00170972 | 0.00196018 | 0.000573241 | 0.000465343 | 0.000396553 | 0.03639 | -2.074618994 |
| UV excision repair protein RAD23 homolog A                          | RAD23A               | 0.00700817 | 0.00383063 | 0.00658252 | 0.000433586 | 0.000300532 | 0.00034538  | 0.01129 | -4.252383333 |
| UV excision repair protein RAD23 homolog B                          | RAD23B               | 0.17742134 | 0.15117764 | 0.20600055 | 0.013791324 | 0.019822933 | 0.016442411 | 0.01387 | -3.431685787 |
| Receptor expression-enhancing protein 5;Receptor expression-enhi:   | REEF5                | 0.00232275 | 0.00402167 | 0.00324094 | 0.000399591 | 0.000629592 | 0.000511576 | 0.02224 | -2.663389598 |
| E3 ubiquitin-protein ligase BRE1A                                   | RNF20                | 0.00012962 | 0.00024746 | 0.00026662 | 2.59152E-05 | 4.96109E-05 | 6.04829E-05 | 0.03132 | -2.318477969 |
| Ubiquitin-40S ribosomal protein S27a;Ubiquitin;40S ribosomal prot   | RPS27A;UBB;UBC;UBA52 | 0.64197738 | 0.80475243 | 0.85935702 | 0.135687792 | 0.211221387 | 0.216726706 | 0.03857 | -1.929789115 |
| Protein transport protein Sec23B                                    | SEC23B               | 0.00023962 | 0.00017891 | 0.00015782 | 6.146E-05   | 0           | 0           | 0.03072 | -1.541490164 |
| Sorting nexin-2                                                     | SNX2                 | 0.00036475 | 0.00058196 | 0.00063206 | 2.9334E-05  | 8.9889E-05  | 0           | 0.02681 | -3.502498811 |
| Spectrin alpha chain, non-erythrocytic 1                            | SPTAN1               | 0.00809148 | 0.00515639 | 0.01049868 | 0.000183218 | 0.000332878 | 0.000471483 | 0.00901 | -4.603337999 |
| Spectrin beta chain, non-erythrocytic 1                             | SPTBN1               | 0.00502335 | 0.00359908 | 0.00709407 | 0.00054001  | 0.001095512 | 0.001035829 | 0.02368 | -2.277862794 |
| Spectrin beta chain, non-erythrocytic 2                             | SPTBN2               | 0.00099194 | 0.00031566 | 0.00128459 | 0           | 4.66053E-05 | 0           | 0.01587 | -4.411684015 |
| SLIT-ROBO Rho GTPase-activating protein 2                           | SRGAP2               | 0.0013999  | 0.00152067 | 0.00148032 | 0.000104715 | 0.000269351 | 0.00030441  | 0.01918 | -2.458347801 |
| Serine/threonine-protein kinase 26                                  | STK26                | 0.0019275  | 0.00160641 | 0.00234852 | 0.000231898 | 0.000526902 | 0.000492571 | 0.03007 | -1.968327263 |
| Syntaxin-7                                                          | STX7                 | 0.00119242 | 0.00045641 | 0.00129007 | 0           | 5.2133E-05  | 0           | 0.0105  | -4.515551786 |
| Transcription elongation factor SPT6                                | SUPT6H               | 0.00124073 | 0.00107652 | 0.00206384 | 0.000235005 | 0.000393458 | 0.000177905 | 0.02599 | -2.400431656 |
| Transglutinin-2                                                     | TAGLN2               | 0.01618744 | 0.01219198 | 0.01417207 | 0.000466409 | 0.000505498 | 0.000508227 | 0.00877 | -4.809201404 |
| TRPM8 channel-associated factor 1                                   | TCAF1                | 0.00277354 | 0.00256705 | 0.00323235 | 0.00054932  | 0.000750124 | 0.000712823 | 0.03613 | -1.96011378  |
| Transketolase                                                       | TKT                  | 0.000761   | 0.00134125 | 0.00165558 | 0.000225189 | 0.000332436 | 0.000150387 | 0.02733 | -2.574374212 |
| DNA topoisomerase 2-alpha                                           | TOP2A                | 0.00096714 | 0.00097293 | 0.00207882 | 5.75649E-05 | 0.000275673 | 0.000101036 | 0.03124 | -3.267466581 |
| Tropomyosin alpha-1 chain                                           | TPM1                 | 0.00409209 | 0.00755407 | 0.01291442 | 0           | 0.000416416 | 0.000109432 | 0.02098 | -5.145151588 |
| Tropomyosin3                                                        | TPM3                 | 0.07874818 | 0.14531561 | 0.16331172 | 0.003734666 | 0.004719599 | 0.001944212 | 0.00765 | -5.282066632 |
| Tropomyosin alpha-4 chain                                           | TPM4                 | 0.02049491 | 0.02594264 | 0.02913508 | 0.000195764 | 0.00036213  | 0           | 0.00701 | -6.606369675 |
| Gamma-tubulin complex component 2                                   | TUBGCP2              | 0.00030835 | 0.00012157 | 0.00065747 | 2.88738E-05 | 0           | 0           | 0.02632 | -3.416749988 |
| Thioredoxin-like protein 1                                          | TXNL1                | 0.06021162 | 0.06215116 | 0.06585807 | 0.013248401 | 0.017587495 | 0.014156752 | 0.03734 | -2.134290944 |
| Ubiquitin-protein ligase E3A                                        | UBE3A                | 0.00687381 | 0.00703988 | 0.00897991 | 0.000602666 | 0.001189952 | 0.000973479 | 0.01645 | -2.85432969  |
| Ubiquitin-protein ligase E3C                                        | UBE3C                | 0.00697738 | 0.00570187 | 0.00625555 | 0.000402967 | 0.00059142  | 0.000207419 | 0.01089 | -3.956402671 |
| Ubiquitin domain-containing protein UBFD1                           | UBFD1                | 0.00179851 | 0.00185083 | 0.00270253 | 0           | 0.000179639 | 0.000113547 | 0.01386 | -3.69590695  |
| Ubiquitin-like protein 4A                                           | UBL4A                | 0.0025851  | 0.00438794 | 0.00463147 | 0           | 0           | 0.000446617 | 0.0102  | -3.296434056 |
| Ubiquitin-like domain-containing CTD phosphatase 1                  | UBLCP1               | 0.00480417 | 0.00351157 | 0.00466079 | 0.00020401  | 0.000282865 | 6.61396E-05 | 0.01289 | -4.513863045 |
| Ubiquitin-1                                                         | UBQLN1               | 0.00753219 | 0.00704219 | 0.00995433 | 0.001283664 | 0.001724729 | 0.001308013 | 0.0252  | -2.525692705 |
| Ubiquitin carboxyl-terminal hydrolase isozyme L5;Ubiquitin carboxy  | UCHL5                | 0.1025865  | 0.11475976 | 0.1308704  | 0.01854002  | 0.019555056 | 0.018040697 | 0.02223 | -2.629902163 |
| Ubiquitin carboxyl-terminal hydrolase 14;Ubiquitin carboxyl-termin: | USP14                | 0.03412664 | 0.02709201 | 0.0279715  | 0.006043219 | 0.009417768 | 0.006152079 | 0.03789 | -2.184811894 |
| Ubiquitin carboxyl-terminal hydrolase 15                            | USP15                | 0.00257838 | 0.00224788 | 0.0027155  | 0.000294512 | 0.000260859 | 0.000291539 | 0.01589 | -3.144703548 |
| Transitional endoplasmic reticulum ATPase                           | VCP                  | 0.05238775 | 0.041566   | 0.05162846 | 0.014726657 | 0.018071014 | 0.01863655  | 0.04525 | -1.514489076 |
| Vacuolar protein sorting-associated protein 26A                     | VPS26A               | 0.00274314 | 0.00241191 | 0.00279414 | 0.000305134 | 0.000661577 | 0.000393379 | 0.0223  | -2.801837457 |
| Vacuolar protein sorting-associated protein 29                      | VPS29                | 0.01180663 | 0.00716288 | 0.01204128 | 0.001736817 | 0.001717229 | 0.00100072  | 0.01972 | -2.781442762 |

Table S4. &gt;2x fold increased DAPs (Glucose-free / Normal)

| Protein names                                                                                 | Gene names    | Normal #1  | Normal #2  | Normal #3  | glucose-free #1 | glucose-free #2 | glucose-free #3 | p-value | Log2(Glucose-free/Normal) |
|-----------------------------------------------------------------------------------------------|---------------|------------|------------|------------|-----------------|-----------------|-----------------|---------|---------------------------|
| Aminoacyl tRNA synthase complex-interacting multifunctional protein 2                         | AIMP2         | 0.00091362 | 0.00063953 | 0.001019   | 0.002133097     | 0.004257377     | 0.002942849     | 0.04709 | 1.687555276               |
| Rho guanine nucleotide exchange factor 2                                                      | ARHGEF2       | 0.00029834 | 0.00031563 | 0.00033819 | 0.001507069     | 0.001417072     | 0.003453413     | 0.02228 | 2.2554438                 |
| Ribosome biogenesis protein BMS1 homolog                                                      | BMS1          | 0.00019943 | 0.00026849 | 7.9539E-05 | 0.000712982     | 0.002075247     | 0.00211917      | 0.03502 | 3.379359399               |
| Ribosome biogenesis protein BOP1                                                              | BOP1          | 0.00015256 | 0.00014646 | 0.00021141 | 0.000807504     | 0.001707719     | 0.000860491     | 0.02077 | 2.654357521               |
| Ribosome biogenesis protein BRX1 homolog                                                      | BRX1          | 0.00050965 | 0.00076181 | 0.00268298 | 0.006244692     | 0.011203975     | 0.009834485     | 0.03875 | 3.690340693               |
| Cell division cycle protein 27 homolog                                                        | CDC27         | 4.6313E-05 | 4.1797E-05 | 0.00010509 | 0.000284986     | 0.000385583     | 0.00035979      | 0.02421 | 2.957672201               |
| CDKN2A-interacting protein                                                                    | CDKN2AIAP     | 0.00019236 | 0.00016669 | 0.00083461 | 0.001475461     | 0.004229116     | 0.002538214     | 0.04985 | 3.721902974               |
| Charged multivesicular body protein 5                                                         | CHMP5         | 0.00019885 | 0.00019142 | 0          | 0               | 0               | 0.016256255     | 0.00455 | 6.380666016               |
| Cytoskeleton-associated protein 5                                                             | CKAP5         | 0.00047212 | 0.00051138 | 0.00057136 | 0.001365156     | 0.003548439     | 0.002317593     | 0.03565 | 2.18016241                |
| ATP-dependent RNA helicase DDX18                                                              | DDX18         | 0.00030443 | 0.00026053 | 0.00026446 | 0.000894952     | 0.00187608      | 0.001557025     | 0.02994 | 2.557654309               |
| ATP-dependent RNA helicase DDX54                                                              | DDX54         | 0.00051853 | 0.00062707 | 0.00101562 | 0.00220201      | 0.005806646     | 0.004213611     | 0.02664 | 2.748358725               |
| ATP-dependent RNA helicase A                                                                  | DHX9          | 0.00982197 | 0.01060295 | 0.02046214 | 0.028895339     | 0.070151753     | 0.046441437     | 0.04759 | 2.130946627               |
| Cytoplasmic dynein 2 heavy chain 1                                                            | DYNC2H1       | 3.5478E-05 | 3.9204E-05 | 5.0083E-05 | 0.000530087     | 0.00094684      | 0.000886457     | 0.01052 | 4.498963165               |
| Probable rRNA-processing protein EBP2                                                         | EBNA1BP2      | 0.00226722 | 0.00244572 | 0.00516906 | 0.015426544     | 0.03449994      | 0.028499659     | 0.01818 | 3.542611147               |
| Elongation factor 2                                                                           | EEF2          | 0.03457843 | 0.03033707 | 0.05767193 | 0.085614148     | 0.210203453     | 0.158539577     | 0.04641 | 2.196898552               |
| Ribosomal RNA small subunit methyltransferase NEP1                                            | EMG1          | 0.00077634 | 0.00160327 | 0.0028893  | 0.011154115     | 0.015090877     | 0.014886769     | 0.01978 | 3.214944958               |
| ELKS/Rab6-interacting/CAST family member 1,ERC protein 2                                      | ERC1,ERC2     | 9.654E-05  | 3.6997E-05 | 5.7084E-05 | 0               | 0.000171803     | 0               | 0.04282 | 1.589601947               |
| Exosome component 10                                                                          | EXOSC10       | 0.00288014 | 0.00243306 | 0.00467778 | 0.008698989     | 0.017544635     | 0.011518255     | 0.04378 | 1.999712824               |
| Exosome complex component RRP42                                                               | EXOSC7        | 4.6533E-05 | 0.00019492 | 0.00037002 | 0.002348546     | 0.001523285     | 0.003018596     | 0.03644 | 3.590791614               |
| pre-rRNA processing protein FTSJ3                                                             | FTSJ3         | 0          | 0          | 0.00032632 | 0.00116035      | 0.003879669     | 0.001784305     | 0.02357 | 2.450994064               |
| Nucleolar GTP-binding protein 2                                                               | GNL2          | 7.5048E-05 | 0.00014233 | 6.4291E-05 | 0.000956448     | 0.001753124     | 0.000725246     | 0.01356 | 3.671808694               |
| Nucleolar GTP-binding protein 1                                                               | GTPBP4        | 0.00195796 | 0.00292589 | 0.00489771 | 0.007202064     | 0.019603273     | 0.015669555     | 0.04784 | 2.421018252               |
| KRR1 small subunit processome component homolog                                               | KRR1          | 0.00029263 | 0.00057578 | 0.0009863  | 0.002962531     | 0.006730957     | 0.005561484     | 0.02438 | 3.271887831               |
| Cell growth-regulating nucleolar protein                                                      | LYAR          | 0.00229228 | 0.00290663 | 0.00594337 | 0.012231361     | 0.018742047     | 0.014397624     | 0.03542 | 2.308413393               |
| MAP7 domain-containing protein 1                                                              | MAP7D1        | 9.5527E-05 | 8.5115E-05 | 0.00030334 | 0.000668892     | 0.000824286     | 0.000805978     | 0.03571 | 3.076763017               |
| M-phase phosphoprotein 6                                                                      | MPHOSPH6      | 0.00032433 | 0.00038368 | 0.00070275 | 0.008847283     | 0.015727086     | 0.01113173      | 0.00088 | 4.858626687               |
| Myb-binding protein 1A                                                                        | MYBBP1A       | 0.0009488  | 0.00086635 | 0.00193068 | 0.003852927     | 0.008497877     | 0.005494499     | 0.03039 | 2.602186362               |
| Nucleolin                                                                                     | NCL           | 0.09021946 | 0.10094944 | 0.21692392 | 0.386679568     | 0.884464446     | 0.664648038     | 0.03485 | 2.718957661               |
| NF-kappa-B-repressing factor                                                                  | NKRF          | 0.001188   | 0.00125667 | 0.00341027 | 0.005649949     | 0.016158369     | 0.009199299     | 0.04617 | 2.871914636               |
| Nucleolar complex protein 2 homolog                                                           | NOC2L         | 0.00036602 | 0.00035827 | 0.00090288 | 0.00203236      | 0.003953336     | 0.003331516     | 0.02552 | 3.18619626                |
| Nucleolar complex protein 3 homolog                                                           | NOC3L         | 0.00018987 | 9.8173E-05 | 0.00048751 | 0.000992593     | 0.003760464     | 0.002387888     | 0.04508 | 3.652674087               |
| Nucleolar protein 7                                                                           | NOL7          | 0          | 0.00122412 | 0.00078094 | 0.003341074     | 0.004356223     | 0.005404732     | 0.04424 | 2.155565408               |
| Nucleolar MIF4G domain-containing protein 1                                                   | NOM1          | 1.7791E-05 | 0          | 3.99E-05   | 0.000211213     | 0.000701317     | 0.000294733     | 0.02922 | 3.467561343               |
| Nucleolar protein 16                                                                          | NOP16         | 0.00104092 | 0.00096587 | 0.00055235 | 0.005233457     | 0.011492479     | 0.006826989     | 0.01586 | 2.821341029               |
| tRNA (cytosine(34)-C(5))-methyltransferase                                                    | NSUN2         | 0.0009468  | 0.0012863  | 0.00360115 | 0.006387249     | 0.011563333     | 0.007142635     | 0.04728 | 2.472323606               |
| p21-activated protein kinase-interacting protein 1                                            | PAK1IP1       | 9.2414E-05 | 0.00024269 | 0.0002499  | 0.00352384      | 0.006468839     | 0.003903612     | 0.0103  | 4.007634984               |
| 28 kDa heat- and acid-stable phosphoprotein                                                   | PDAIP1        | 0.00738607 | 0.01207055 | 0.01231985 | 0.021838413     | 0.065758562     | 0.036790965     | 0.04837 | 1.607859625               |
| Programmed cell death protein 4                                                               | PDCD4         | 0.00277668 | 0.00350288 | 0.00670874 | 0.011755093     | 0.026888201     | 0.017769059     | 0.0368  | 2.342754223               |
| Sister chromatid cohesion protein PDSS homolog A                                              | PDSSA         | 3.6194E-05 | 8.4639E-05 | 0.00034757 | 0.001247756     | 0.00255381      | 0.001525207     | 0.03926 | 4.171531847               |
| Sister chromatid cohesion protein PDSS homolog B                                              | PDSSB         | 8.7291E-05 | 9.6419E-05 | 0.00015992 | 0.000354835     | 0.000783086     | 0.000511284     | 0.03154 | 2.406737003               |
| Pescadillo homolog                                                                            | PES1          | 0          | 0          | 0.00015665 | 0.002089233     | 0.002213873     | 0.001220271     | 0.00832 | 3.737319884               |
| Suppressor of SWI4 1 homolog                                                                  | PPAN          | 0.00180887 | 0.00148508 | 0.0026006  | 0.006180616     | 0.014089016     | 0.009506182     | 0.03047 | 2.39377889                |
| Periodic tryptophan protein 2 homolog                                                         | PWP2          | 0.00012687 | 0.00015296 | 0.00038593 | 0.001319357     | 0.002100561     | 0.001130854     | 0.02349 | 3.108636953               |
| RNA-binding protein 28                                                                        | RBM28         | 0.00029712 | 0.00035383 | 0.00152041 | 0.002905983     | 0.005665609     | 0.003577841     | 0.04996 | 3.337977305               |
| RNA-binding protein 7                                                                         | RBM7          | 0.00077606 | 0.00062613 | 0.00087653 | 0.00256851      | 0.003830514     | 0.002894168     | 0.03951 | 1.898906709               |
| Ribonuclease inhibitor                                                                        | RNH1          | 2.2496E-05 | 0          | 0          | 0.001309359     | 0.000820268     | 0.001100867     | 0.00413 | 5.612840698               |
| 60S ribosomal protein L23                                                                     | RPL23         | 0.04913671 | 0.05550717 | 0.05743356 | 0.143600495     | 0.344035038     | 0.289728361     | 0.03439 | 2.383954843               |
| 40S ribosomal protein S17-like:40S ribosomal protein S17                                      | RPS17,RPS17L  | 0.0805229  | 0.04305663 | 0.08491369 | 0.191926033     | 0.272565329     | 0.239392464     | 0.04799 | 1.571906737               |
| Ribosomal RNA processing protein 1 homolog A                                                  | RRP1          | 0.00014903 | 0.00020298 | 0.00032652 | 0.001154437     | 0.002411969     | 0.002178172     | 0.01645 | 3.423687071               |
| U3 small nucleolar RNA-interacting protein 2                                                  | RRP9          | 8.0926E-05 | 0          | 0.00035052 | 0.001436112     | 0.002802266     | 0.00160775      | 0.04076 | 3.254893488               |
| Ribosome biogenesis regulatory protein homolog                                                | RRS1          | 0          | 0.00035721 | 0.00057228 | 0.005098748     | 0.009586263     | 0.005043131     | 0.01391 | 3.4953291                 |
| SAP domain-containing ribonucleoprotein                                                       | SARNP         | 0.00049531 | 0.00025244 | 0.00098941 | 0.00177165      | 0.005681279     | 0.003137572     | 0.04961 | 2.663233262               |
| Kanadaplin                                                                                    | SLC4A1AP      | 8.0058E-05 | 4.4836E-05 | 9.9763E-05 | 0               | 0.000211998     | 0               | 0.03171 | 1.40492957                |
| Structural maintenance of chromosomes flexible hinge domain-containing protein 1              | SMCHD1        | 8.7112E-05 | 5.4407E-05 | 0.0001375  | 0.000643961     | 0.001163579     | 0.000564775     | 0.01629 | 2.886024975               |
| Surfeit locus protein 6                                                                       | SURF6         | 0.0002161  | 0.00042963 | 0.00097086 | 0.002714723     | 0.005228968     | 0.004023561     | 0.03106 | 3.227289473               |
| Transducin beta-like protein 3                                                                | TBL3          | 0.00028427 | 0.00034144 | 0.00041052 | 0.001291727     | 0.003219351     | 0.002733132     | 0.02065 | 3.000842701               |
| THUMP domain-containing protein 1                                                             | THUMPD1       | 7.1106E-05 | 0          | 0          | 0.001239047     | 0.002269458     | 0.001560646     | 0.00594 | 4.456022131               |
| TRMT1-like protein                                                                            | TRMT1L        | 0.00066196 | 0.00077492 | 0.00145812 | 0.002356394     | 0.005557788     | 0.003411742     | 0.04152 | 2.13839113                |
| tRNA (adenine(58)-N(1))-methyltransferase non-catalytic subunit TRM6                          | TRMT6         | 0.00090343 | 0.00113169 | 0.00175559 | 0.002685266     | 0.009472147     | 0.006626619     | 0.04668 | 2.549799253               |
| Splicing factor U2AF 35 kDa subunit:Splicing factor U2AF 26 kDa subunit                       | U2AF1L4,U2AF1 | 0          | 0.0113692  | 0.02254909 | 0.06606558      | 0.069747258     | 0.103721157     | 0.0387  | 2.123036301               |
| Ribosome biogenesis protein WDR12                                                             | WDR12         | 0.00103796 | 0.00073716 | 0.00173084 | 0.003207332     | 0.006142163     | 0.004088957     | 0.04153 | 1.949478876               |
| WD repeat-containing protein 3                                                                | WDR3          | 0.00020805 | 0.00029641 | 0.00047884 | 0.002408321     | 0.003883152     | 0.00224613      | 0.01586 | 3.022361673               |
| WD repeat-containing protein 36                                                               | WDR36         | 8.6922E-05 | 0.00014149 | 0.00040413 | 0.00069162      | 0.001856123     | 0.001265446     | 0.04822 | 3.160822966               |
| Tyrosine--tRNA ligase, cytoplasmic;Tyrosine--tRNA ligase, cytoplasmic, N-terminally processed | YARS          | 0.00215138 | 0.00241108 | 0.00461613 | 0.006998871     | 0.017116031     | 0.015028527     | 0.04146 | 2.639955179               |
| Zinc finger CCCH domain-containing protein 11A                                                | ZC3H11A       | 0          | 0          | 1.8699E-05 | 0               | 0.000277896     | 0.000162946     | 0.01098 | 3.508475057               |
